# Supplementary material for: Effect of Washing Treatment on the Textural Properties and Bioactivity of Silica/Chitosan/TCP Xerogels for Bone Regeneration
Source: MDPI journal article supplement (doi:10.3390/ijms22158321), 2021-08-02
Supplement: s1 [file s1]

## Effect of washing treatment on the textural properties and bioactivity of silica/chitosan/TCP xerogels for bone regeneration

Antonio Pérez-Moreno, María Virtudes Reyes-Peces, José Ignacio Vilches-Pérez, Rafael Fernández-Montesinos, Gonzalo Pinaglia-Tobaruela, Mercedes Salido, Nicolás de la Rosa-Fox and Manuel Piñero

### ▪ SUPPLEMENTARY MATERIAL

SM1. Figure S1. Images of SiO<sub>2</sub>/CS and SiO<sub>2</sub>/CS/TCP hybrid xerogels obtained by evaporative drying at 80 °C and ambient air pressure

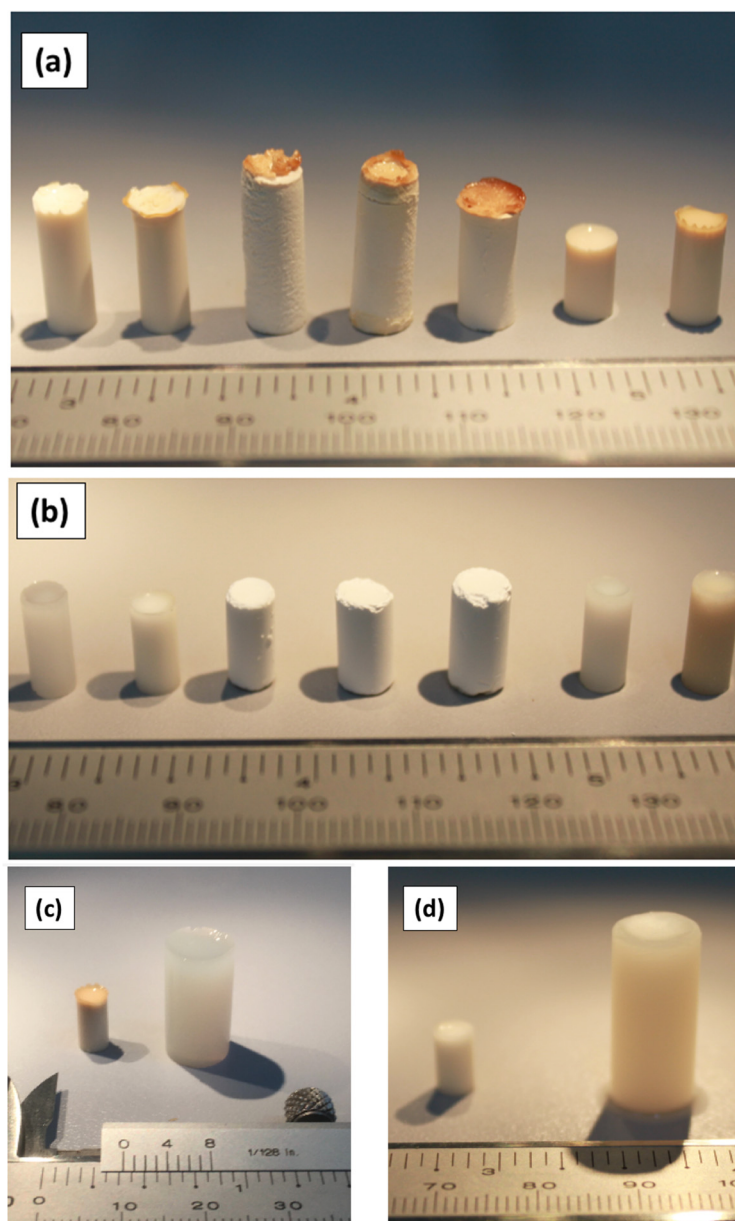

**Figure. S1.** Images of SCS4, SCS8, SCS16, SCS20, SCS40, SCS8T10 and SCS8T20 xerogels (a) Unwashed (U), and (b) Ethanol- washed for 7 days (E7); and images of gels with the same composition: in dry state (xerogel), at the left, and in wet gel state, at the right, for both: (c) SCS8T10\_U; (d) SCS8\_E7 specimens, showing the great shrinkage underwent during evaporative drying at 80 °C

**SM2. Table S1. Bulk density and textural data from N<sub>2</sub>-physisorption of SiO<sub>2</sub>/CS and SiO<sub>2</sub>/CS/TCP hybrid xerogels**

**Table S1.** Bulk density and BET textural parameters for SCSx and SCSxTy xerogels

| Sample                           | Unwashed                       |                                  |                               |           | Ethanol-washed                 |                                  |                               |           |                                |                                  |                               |           | Water-washed                   |                                  |                               |           |
|----------------------------------|--------------------------------|----------------------------------|-------------------------------|-----------|--------------------------------|----------------------------------|-------------------------------|-----------|--------------------------------|----------------------------------|-------------------------------|-----------|--------------------------------|----------------------------------|-------------------------------|-----------|
|                                  |                                |                                  |                               |           | 1 day ethanol-soaking          |                                  |                               |           | 7 days ethanol-soaking         |                                  |                               |           | 30 days water- soaking         |                                  |                               |           |
|                                  |                                |                                  |                               |           | E1                             |                                  |                               |           | E7                             |                                  |                               |           | W30                            |                                  |                               |           |
|                                  | $\rho$<br>(g/cm <sup>3</sup> ) | $S_{BET}$<br>(m <sup>2</sup> /g) | $V_p$<br>(cm <sup>3</sup> /g) | D<br>(nm) | $\rho$<br>(g/cm <sup>3</sup> ) | $S_{BET}$<br>(m <sup>2</sup> /g) | $V_p$<br>(cm <sup>3</sup> /g) | D<br>(nm) | $\rho$<br>(g/cm <sup>3</sup> ) | $S_{BET}$<br>(m <sup>2</sup> /g) | $V_p$<br>(cm <sup>3</sup> /g) | D<br>(nm) | $\rho$<br>(g/cm <sup>3</sup> ) | $S_{BET}$<br>(m <sup>2</sup> /g) | $V_p$<br>(cm <sup>3</sup> /g) | D<br>(nm) |
| Pure SiO <sub>2</sub><br>xerogel | 0.79±0.01                      | 668.5                            | 0.81                          | 4.5       | ---                            | ---                              | ---                           | ---       | ---                            | ---                              | ---                           | ---       | 1.22±0.02                      | 827.4                            | 0.47                          | 2.6       |
| SCS4                             | 1.04±0.06                      | 653.3                            | 0.58                          | 3.4       | 0.53±0.02                      | 836.8                            | 1.30                          | 5.7       | 0.53±0.02                      | 834.4                            | 1.43                          | 6.2       | 1.58±0.02                      | 747.4                            | 0.45                          | 2.9       |
| SCS8                             | 1.04±0.03                      | 653.0                            | 0.58                          | 3.3       | 0.36±0.05                      | 826.7                            | 1.47                          | 6.7       | 0.24±0.05                      | 815.1                            | 1.64                          | 7.1       | 1.38±0.05                      | 741.0                            | 0.40                          | 2.5       |
| SCS12                            | 0.78±0.03                      | 653.7                            | 0.56                          | 3.3       | 0.27±0.01                      | 802.7                            | 1.43                          | 6.6       | 0.33±0.01                      | 857.4                            | 1.68                          | 7.5       | 1.39±0.01                      | 757.1                            | 0.42                          | 2.6       |
| SCS20                            | 0.71±0.04                      | 592.0                            | 0.48                          | 3.2       | 0.28±0.03                      | 852.4                            | 1.31                          | 5.7       | 0.25±0.03                      | 867.6                            | 1.70                          | 7.2       | 1.33±0.03                      | 737.2                            | 0.40                          | 2.9       |
| SCS40                            | 0.64±0.02                      | 523.1                            | 0.46                          | 3.3       | ---                            | ---                              | ---                           | ---       | ---                            | ---                              | ---                           | ---       | 1.28±0.02                      | 687.3                            | 0.43                          | 2.9       |
| SCS8T10                          | 1.20±0.03                      | 485.5                            | 0.43                          | 3.3       | 0.58±0.01                      | 821.2                            | 1.23                          | 5.5       | 0.53±0.02                      | 870.0                            | 1.49                          | 6.3       | 1.43±0.01                      | 662.2                            | 0.39                          | 2.7       |
| SCS8T20                          | 1.53±0.03                      | 360.8                            | 0.28                          | 3.0       | 0.63±0.02                      | 728.4                            | 0.91                          | 4.7       | 0.56±0.01                      | 887.6                            | 1.40                          | 6.0       | 1.48±0.03                      | 663.7                            | 0.42                          | 2.7       |

**SM3. Table S2. BET and t-Plot textural parameters for SCSxTy\_W30 xerogels.**

**Table S2.** BET and t-plot textural parameters for W30 xerogels. ( $r_1$  and  $r_2$  are the coefficients from linear regression in t-plot for the first (0.35 nm <  $t$  < 0.5 nm) and second linear regime ( $t$  > 1.0 nm) , respectively)

| Sample      | BET                              |                               |           | t-plot                           |                                   |                                  |                                  |                                   |                                     | $r_1/r_2$     |
|-------------|----------------------------------|-------------------------------|-----------|----------------------------------|-----------------------------------|----------------------------------|----------------------------------|-----------------------------------|-------------------------------------|---------------|
|             | $S_{BET}$<br>(m <sup>2</sup> /g) | $V_p$<br>(g/cm <sup>3</sup> ) | D<br>(nm) | $S_{tot}$<br>(m <sup>2</sup> /g) | $S_{meso}$<br>(m <sup>2</sup> /g) | $S_{mic}$<br>(m <sup>2</sup> /g) | $S_{Ext}$<br>(m <sup>2</sup> /g) | $V_{Tot}$<br>(cm <sup>3</sup> /g) | $V_{micro}$<br>(cm <sup>3</sup> /g) | $r_1/r_2$     |
| SCh0_W30    | 827.4                            | 0.47                          | 2.6       | 691.3                            | 686.5                             | 136.1                            | 4.8                              | 0.47                              | 0.06                                | 0.9987/0.9899 |
| SCh4_W30    | 747.4                            | 0.45                          | 2.9       | 679.6                            | 672.8                             | 67.8                             | 6.8                              | 0.44                              | 0.03                                | 0.9996/0.9859 |
| SCh8_W30    | 741.0                            | 0.40                          | 2.5       | 537.0                            | 531.6                             | 204.0                            | 5.4                              | 0.39                              | 0.10                                | 0.9971/0.9929 |
| SCh12_W30   | 757.1                            | 0.42                          | 2.6       | 571.0                            | 564.7                             | 186.1                            | 6.3                              | 0.40                              | 0.09                                | 0.9974/0.9988 |
| SCh20_W30   | 737.2                            | 0.40                          | 2.9       | 558.4                            | 551.6                             | 178.8                            | 6.8                              | 0.39                              | 0.09                                | 0.9973/0.9994 |
| SCh40_W30   | 687.3                            | 0.43                          | 2.9       | 601.8                            | 589.1                             | 85.5                             | 12.7                             | 0.40                              | 0.04                                | 0.9995/0.9970 |
|             |                                  |                               |           |                                  |                                   |                                  |                                  |                                   |                                     |               |
| SCh8T10_W30 | 662.2                            | 0.39                          | 2.7       | 529.8                            | 525.2                             | 132.4                            | 4.6                              | 0.38                              | 0.06                                | 0.9989/0.9913 |
| SCh8T20_W30 | 663.7                            | 0.42                          | 2.7       | 623.8                            | 620.9                             | 39.9                             | 2.9                              | 0.41                              | 0.02                                | 0.9997/0.9919 |

SM4. Figure S2. pH time evolution of xerogels soaked in PBS

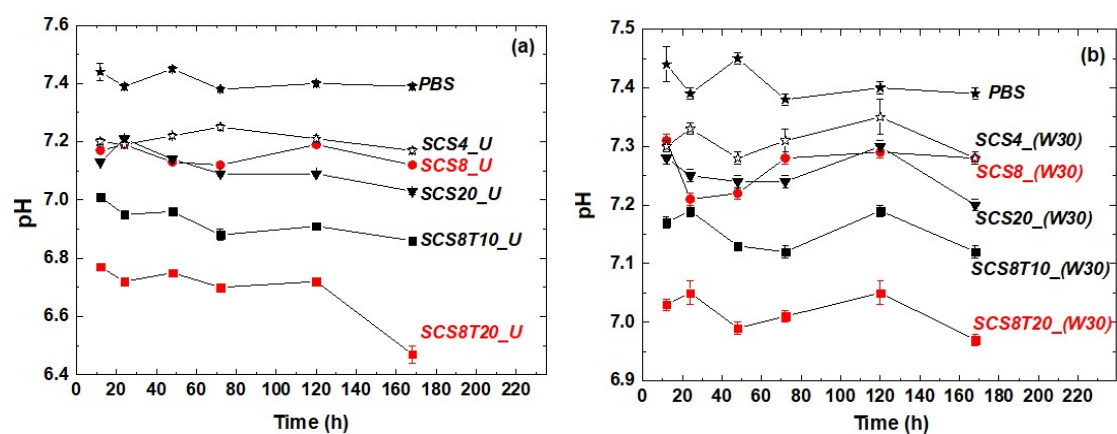

Figure S2. pH evolution of SCSx and SCSxTy xerogels soaked in PBS solution after 12, 24, 48, 72, 120 and 168 h, previously subjected to different washing treatments before evaporative drying

SM5. Figure S3. Elemental mapping at the microstructural level by scanning electron microscopy (SEM) with energy dispersive X-ray spectrometry (HA grown on SCS8T10\_E7 and SCS8T20\_E7 surfaces after 4 weeks soaking in SBF)

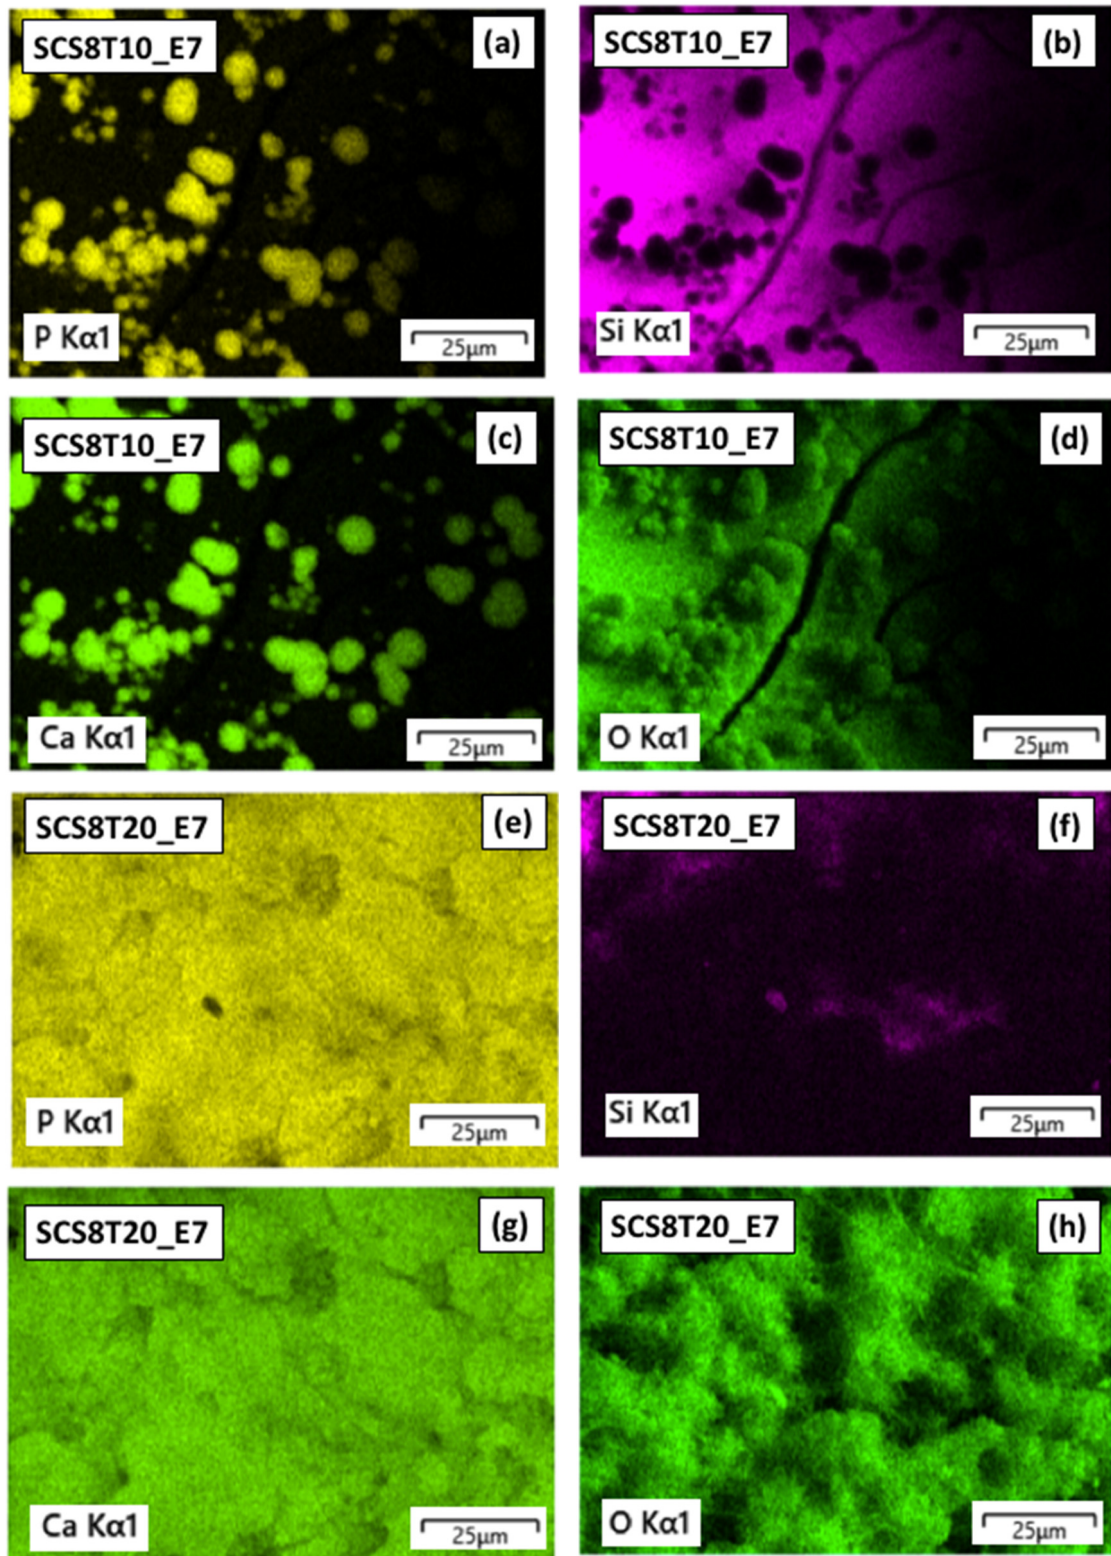

**Figure S3.** SEM-EDS compositional imaging of elemental distributions of the apatite layer formed after 4 weeks soaking in SBF for P (yellow), Si (purple), Ca (light green) and O (dark green) in (a, b, c, d) SCS8T10\_E7 ; and (e, f, g, h) SCS8T20\_E7, which surface appears almost totally covered by biomimetic apatite



SM 6: Figure S4: Live /dead assay. Positive and negative controls

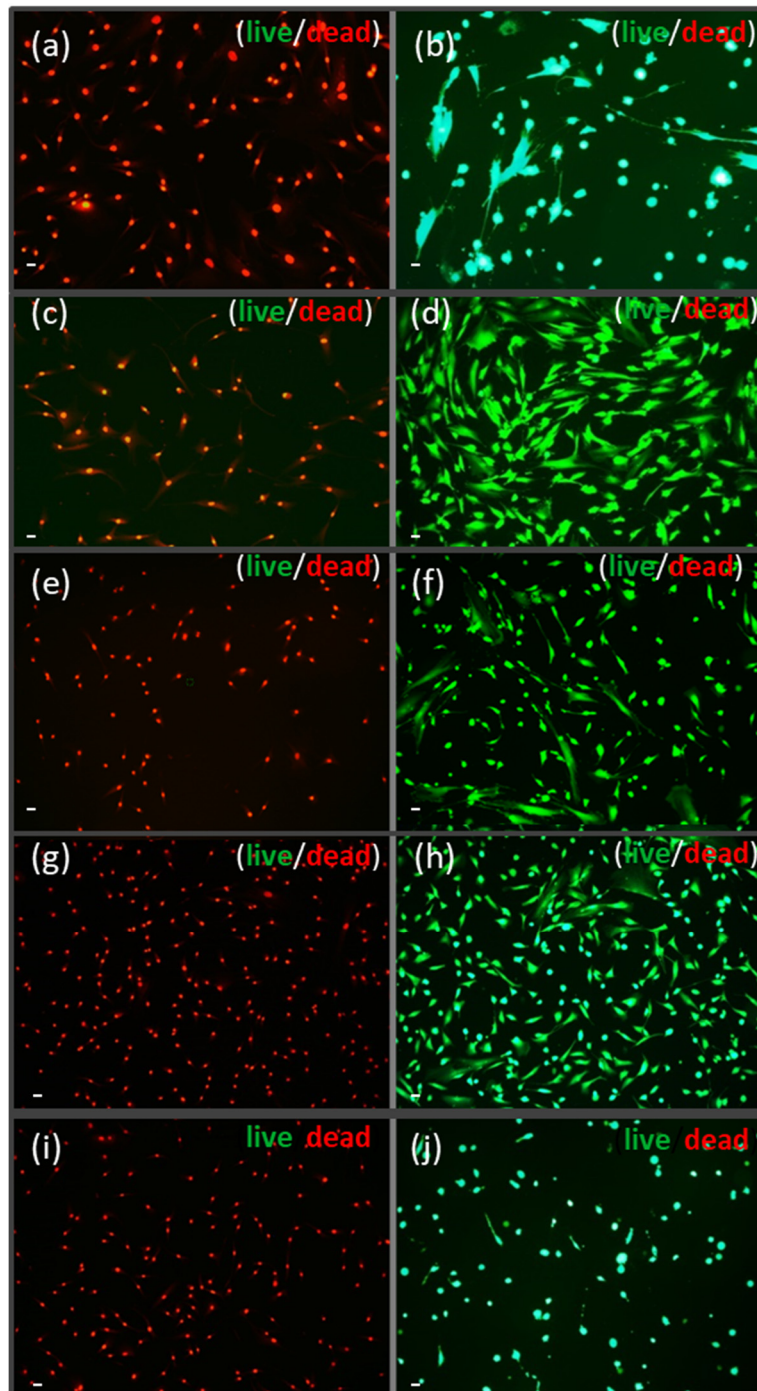

**Figure S4:** Negative controls after treatment with 70% ethanol for 30 minutes before staining: a, c, e, g and i. Positive controls: HOB cultures without xerogels: b, d, f, h and j. Live cells appear green; the nuclei of dead cells stained in red and Xerogels in gray. Scale bar represents 20  $\mu\text{m}$ .

## SM 7: Figure S5: Live /dead assay. Column graphs

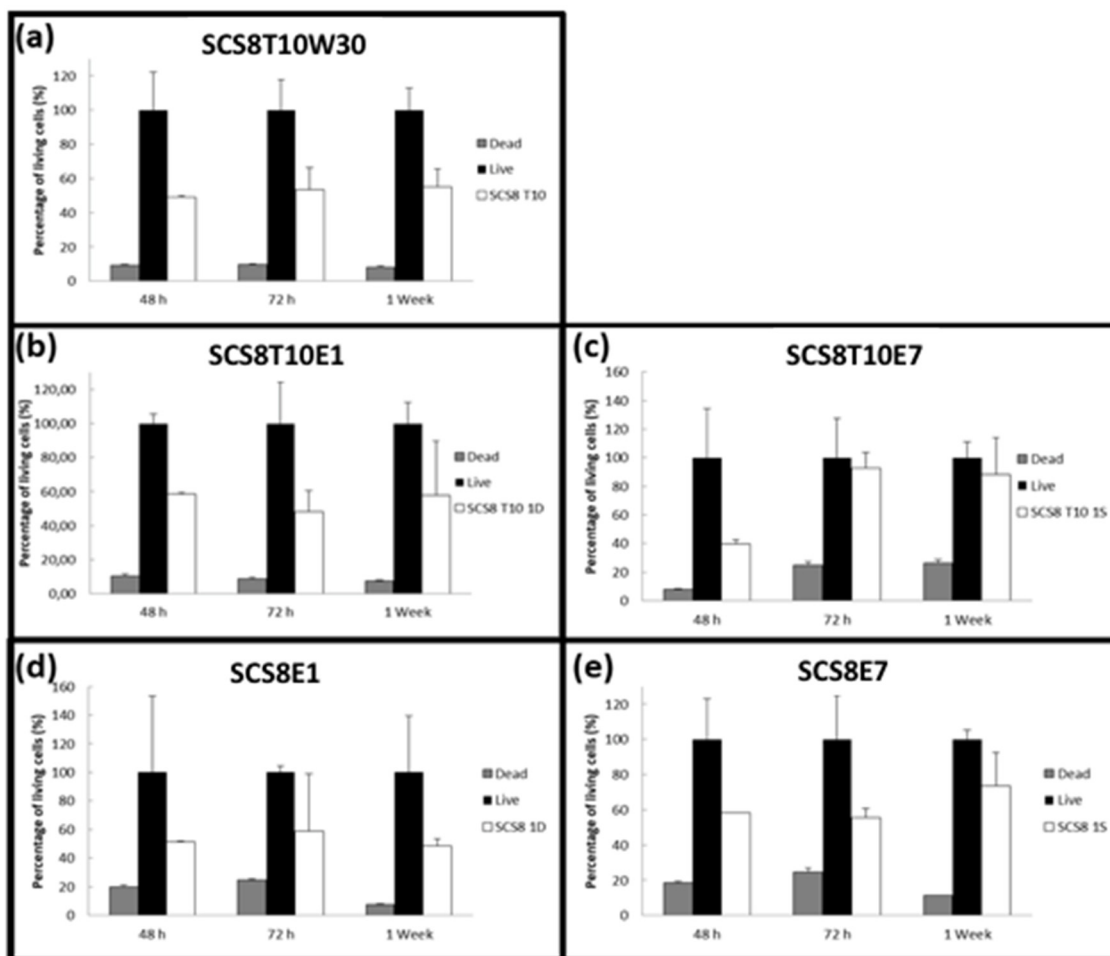

**Figure S5.** Percentage of live cells in HOB cultures. Dead control (Dead Control) were obtained by treating cultures with 70% methanol for 30 minutes before staining. The cultures for the reference value (100%) of live cells (Live Control) are obtained from cultures without treatments under optimal conditions for their growth at the indicated times. The cultures with the different xerogels are obtained from cultures with xerogel treatments under optimal conditions for their growth at the indicated times. Histogram representation of 48 hour, 72 hour and one week HOB cultures include negative control (Dead), positive control (Live) and treatment with (a) SCS8 T10 (b) SCS8 T10E1; (c) SCS8 T10E7; (d) SCS8E1 and (e) SCS8E7. Quantification analysed in 10 images per experiment ( $n=3$ ). The values correspond to mean  $\pm$  SEM. No statistically significant difference was found between the different xeromaterials (Anova test).

**SM8. Table S3.** Quantitative data obtained after Live Dead cell analysis. Live and dead data represent positive and negative controls respectively

|                   | 48h      |        | 72h      |        | 1 Week   |        |
|-------------------|----------|--------|----------|--------|----------|--------|
| <b>SCS8T10W30</b> | Mean (%) | SD     | Mean (%) | SD     | Mean (%) | SD     |
| Dead              | 9.851    | 0.077  | 9.821    | 0.159  | 8.075    | 0.860  |
| Live              | 100      | 22.151 | 100      | 17.899 | 100      | 12.747 |
| Sample            | 49.032   | 1.972  | 53.427   | 18.423 | 54.964   | 10.533 |
| <b>SCS8T10 E1</b> |          |        |          |        |          |        |
| Dead              | 10.485   | 0.936  | 8.758    | 0.748  | 7.385    | 0.681  |
| Live              | 100      | 5.652  | 100      | 24.254 | 100      | 12.361 |
| Sample            | 58.607   | 7.858  | 48.050   | 7.782  | 57.789   | 31.922 |
| <b>SCS8T10 E7</b> |          |        |          |        |          |        |
| Dead              | 6.259    | 0.468  | 24.617   | 2.759  | 25.994   | 2.770  |
| Live              | 100      | 34.159 | 100      | 27.383 | 100      | 10.902 |
| Sample            | 39.713   | 4.983  | 92.641   | 23.001 | 88.228   | 25.550 |
| <b>SCS8E1</b>     |          |        |          |        |          |        |
| Dead              | 20.230   | 0.040  | 24.916   | 0.441  | 7.632    | 0.448  |
| Live              | 100      | 53.485 | 100      | 4.631  | 100      | 39.645 |
| Sample            | 51.561   | 9.985  | 59.176   | 14.727 | 48.796   | 4.745  |
| <b>SCS8E7</b>     |          |        |          |        |          |        |
| Dead              | 20.220   | 0.076  | 24.473   | 2.696  | 11.282   | 0.044  |
| Live              | 100      | 23.001 | 100      | 25.001 | 100      | 5.273  |
| Sample            | 58.196   | 7.052  | 55.332   | 7.910  | 73.465   | 19.158 |

SM9. Table S4. Raw Data from table S3:

**SCS8T10\_U**

**48 hours**

| Negative control |       |       | Positive control |        |        | Samples |       |       |
|------------------|-------|-------|------------------|--------|--------|---------|-------|-------|
| A                | B     | C     | A                | B      | C      | A       | B     | C     |
| 1.104            | 1.086 | 1.110 | 7.909            | 12.113 | 27.103 | 6.786   | 3.612 | 4.369 |
| 1.099            | 1.084 | 1.104 | 7.813            | 16.173 | 31.195 | 8.238   | 2.522 | 4.163 |
| 1.092            | 1.083 | 1.096 | 9.646            | 12.053 | 27.215 | 4.540   | 6.624 | 6.662 |
| 1.110            | 1.096 | 1.114 | 7.777            | 4.968  | 15.807 | 9.033   | 5.828 | 3.710 |
| 1.098            | 1.082 | 1.102 | 16.929           | 14.813 | 29.414 | 6.859   | 3.951 | 8.793 |
| 1.084            | 1.085 | 1.092 | 10.212           | 20.831 | 37.849 | 6.919   | 7.885 | 6.180 |
| 1.096            | 1.092 | 1.104 | 4.232            | 30.084 | 40.266 | 1.887   | 5.480 | 5.450 |
| 1.088            | 1.086 | 1.094 | 8.965            | 9.368  | 24.199 | 3.263   | 9.358 | 3.887 |
| 1.105            | 1.094 | 1.105 | 6.433            | 6.498  | 20.538 | 5.174   | 6.267 | 5.298 |
| 1.105            | 1.078 | 1.111 | 5.486            | 7.578  | 21.862 | 3.886   | 3.316 | 3.715 |

**72 hours**

| Negative control |       |       | Positive control |        |        | Samples |       |       |
|------------------|-------|-------|------------------|--------|--------|---------|-------|-------|
| A                | B     | C     | A                | B      | C      | A       | B     | C     |
| 1.000            | 1.004 | 1.000 | 19.729           | 6.297  | 5.953  | 3.649   | 8.405 | 5.147 |
| 1.000            | 1.000 | 1.000 | 21.392           | 8.861  | 9.101  | 2.712   | 8.922 | 4.277 |
| 1.000            | 1.000 | 1.000 | 12.597           | 8.169  | 6.800  | 2.926   | 6.418 | 5.163 |
| 1.000            | 1.000 | 1.102 | 15.303           | 10.372 | 12.653 | 5.552   | 8.014 | 3.486 |
| 1.000            | 1.000 | 1.051 | 5.440            | 9.427  | 13.254 | 2.912   | 8.721 | 4.439 |
| 1.000            | 1.000 | 1.000 | 9.172            | 6.803  | 12.991 | 4.029   | 6.902 | 6.756 |
| 1.000            | 1.095 | 1.000 | 5.362            | 11.356 | 18.274 | 5.233   | 6.957 | 7.937 |
| 1.010            | 1.000 | 1.000 | 11.141           | 7.487  | 13.792 | 3.159   | 8.101 | 5.471 |
| 1.000            | 1.021 | 1.180 | 9.124            | 7.619  | 4.738  | 3.141   | 5.873 | 6.429 |
| 1.000            | 1.000 | 1.000 | 11.838           | 7.786  | 7.350  | 2.413   | 5.472 | 7.104 |

**1 week**

| Negative control |       |       | Positive control |        |        | Samples |        |        |
|------------------|-------|-------|------------------|--------|--------|---------|--------|--------|
| A                | B     | C     | A                | B      | C      | A       | B      | C      |
| 1.878            | 2.263 | 1.014 | 18.838           | 15.912 | 13.927 | 11.339  | 6.444  | 3.848  |
| 1.011            | 0.405 | 1.013 | 24.564           | 13.202 | 20.834 | 12.257  | 7.972  | 7.860  |
| 1.948            | 1.022 | 1.063 | 14.732           | 14.998 | 26.901 | 11.235  | 12.051 | 10.655 |
| 1.979            | 1.010 | 1.029 | 12.178           | 17.227 | 27.403 | 9.462   | 9.914  | 10.359 |
| 1.032            | 2.260 | 2.329 | 13.713           | 13.913 | 18.924 | 10.839  | 5.532  | 8.789  |
| 1.327            | 1.006 | 1.019 | 9.563            | 11.198 | 11.503 | 15.443  | 11.176 | 11.197 |
| 1.007            | 1.382 | 1.040 | 14.071           | 15.232 | 14.286 | 8.494   | 9.160  | 6.278  |
| 1.019            | 1.009 | 1.061 | 12.775           | 14.581 | 15.368 | 13.878  | 4.803  | 5.413  |
| 1.020            | 1.015 | 2.476 | 21.179           | 22.341 | 24.104 | 7.138   | 9.820  | 5.464  |
| 2.138            | 0.405 | 2.091 | 15.526           | 12.526 | 17.217 | 11.003  |        |        |



**SCS8T10\_ E1****48 hours**

| Negative control |       |       | Positive control |        |        | Samples |        |       |
|------------------|-------|-------|------------------|--------|--------|---------|--------|-------|
| A                | B     | C     | A                | B      | C      | A       | B      | C     |
| 1.087            | 1.082 | 1.024 | 14.579           | 9.782  | 13.672 | 7.465   | 7.995  | 4.605 |
| 1.020            | 1.085 | 1.087 | 9.890            | 8.701  | 17.404 | 3.364   | 5.482  | 9.476 |
| 1.019            | 1.011 | 1.013 | 12.908           | 7.677  | 4.205  | 3.642   | 7.630  | 5.605 |
| 1.019            | 1.022 | 1.087 | 7.008            | 7.168  | 5.374  | 4.598   | 6.902  | 5.132 |
| 1.965            | 1.086 | 1.013 | 10.812           | 6.792  | 4.536  | 7.562   | 4.864  | 6.498 |
|                  |       |       | 12.252           | 9.529  | 8.538  | 4.370   | 5.793  | 7.801 |
|                  |       |       |                  | 12.337 | 13.758 | 4.697   | 5.259  | 5.616 |
|                  |       |       |                  | 11.201 | 17.956 | 6.792   | 11.755 | 5.744 |
|                  |       |       |                  | 16.309 | 10.208 |         |        |       |
|                  |       |       |                  | 14.105 | 5.373  |         |        |       |

**72 hours**

| Negative control |       |       | Positive control |        |        | Samples |        |       |
|------------------|-------|-------|------------------|--------|--------|---------|--------|-------|
| A                | B     | C     | A                | B      | C      | A       | B      | C     |
| 1.016            | 1.017 | 1.018 | 10.348           | 19.793 | 18.096 | 7.727   | 7.426  | 4.821 |
| 1.015            | 1.021 | 1.021 | 9.098            | 17.146 | 16.562 | 3.671   | 6.962  | 5.111 |
| 1.014            | 1.017 | 1.842 | 12.815           | 15.049 | 10.053 | 6.316   | 5.886  | 4.747 |
| 1.017            | 1.018 | 1.021 | 8.618            | 17.754 | 18.304 | 4.725   | 4.960  | 6.229 |
| 1.020            | 1.833 | 1.023 | 8.285            | 14.631 | 15.411 | 4.572   | 13.628 | 4.688 |
|                  |       |       | 9.695            | 4.818  | 17.530 | 4.844   | 5.599  |       |
|                  |       |       | 11.515           | 9.443  | 18.098 | 10.019  | 5.287  |       |
|                  |       |       | 9.106            | 10.122 | 17.639 | 8.783   |        |       |
|                  |       |       | 7.610            | 9.354  | 15.228 |         |        |       |
|                  |       |       | 11.590           | 8.421  | 14.091 |         |        |       |

**1 week**

| Negative control |       |       | Positive control |        |        | Samples |        |        |
|------------------|-------|-------|------------------|--------|--------|---------|--------|--------|
| A                | B     | C     | A                | B      | C      | A       | B      | C      |
| 1.980            | 1.077 | 0.991 | 26.508           | 16.019 | 19.490 | 9.964   | 22.618 | 20.008 |
| 1.030            | 1.040 | 0.957 | 14.235           | 16.388 | 23.109 | 8.307   | 24.999 | 5.682  |
| 1.035            | 2.148 | 1.869 | 17.389           | 13.527 | 23.127 | 7.447   | 21.947 | 7.627  |
| 2.587            | 2.526 | 2.198 | 25.182           | 16.835 | 17.066 | 6.994   | 29.831 | 5.720  |
| 2.504            | 2.120 | 1.654 | 29.404           | 18.195 | 17.300 | 7.316   | 46.117 | 7.621  |
|                  |       |       | 31.632           | 24.462 | 26.296 | 4.240   | 11.961 | 9.825  |
|                  |       |       | 32.323           | 27.757 | 32.580 | 5.241   | 14.505 | 16.805 |
|                  |       |       | 31.831           | 29.413 | 30.238 | 6.722   | 13.635 | 9.152  |
|                  |       |       |                  |        | 20.096 | 9.333   | 10.453 | 13.804 |
|                  |       |       |                  |        |        | 14      | 22.435 | 17.779 |

**SCS8T10\_E7****48 hours**

| Negative control |       |       | Positive control |        |        | Samples |       |       |
|------------------|-------|-------|------------------|--------|--------|---------|-------|-------|
| A                | B     | C     | A                | B      | C      | A       | B     | C     |
| 0.988            | 0.786 | 0.687 | 7.897            | 15.638 | 9.511  | 4.924   | 3.601 | 5.987 |
| 0.915            | 0.701 | 0.748 | 8.906            | 13.013 | 7.383  | 6.760   | 2.322 | 7.426 |
| 0.846            | 0.725 | 0.740 | 14.497           | 17.091 | 7.984  | 9.220   | 3.333 | 2.645 |
| 0.908            | 0.934 | 0.691 | 27.557           | 20.267 | 9.326  | 5.103   | 3.630 | 6.807 |
| 1.052            | 1.046 | 0.685 | 19.223           | 22.591 | 6.559  | 5.492   | 2.750 | 3.239 |
| 0.792            | 0.704 | 0.743 | 22.108           | 12.413 | 7.651  | 5.810   | 4.292 | 4.348 |
| 0.797            | 0.701 | 0.734 | 11.409           | 23.159 | 6.582  | 4.037   | 7.812 | 2.767 |
| 0.820            | 0.703 | 0.702 | 4.089            | 20.623 | 6.440  | 9.715   | 7.842 | 4.501 |
| 0.818            | 0.744 | 0.703 | 10.914           | 12.378 | 12.115 | 4.605   | 6.808 | 4.816 |
| 0.915            | 1.017 | 1.214 | 9.194            | 15.582 | 10.272 | 3.718   | 6.786 |       |

**72 hours**

| Negative control |       |       | Positive control |        |       | Samples |       |       |
|------------------|-------|-------|------------------|--------|-------|---------|-------|-------|
| A                | B     | C     | A                | B      | C     | A       | B     | C     |
| 1.239            | 1.096 | 1.228 | 4.342            | 9.728  | 3.625 | 4.288   | 9.689 | 4.638 |
| 1.222            | 1.098 | 1.300 | 3.864            | 3.923  | 3.794 | 7.119   | 5.045 | 5.320 |
| 1.297            | 1.098 | 1.147 | 3.595            | 3.535  | 3.935 | 2.204   | 5.568 | 4.793 |
| 1.446            | 1.118 | 1.205 | 4.952            | 7.174  | 4.554 | 3.245   | 3.717 | 3.005 |
| 2.781            | 1.075 | 1.124 | 4.737            | 4.870  | 3.496 | 1.610   | 5.802 | 2.736 |
| 1.152            | 1.087 | 1.099 | 3.999            | 4.107  | 4.929 | 4.987   | 6.213 | 3.722 |
| 1.140            | 1.194 | 1.292 | 7.438            | 11.393 | 3.021 | 3.181   | 6.102 | 3.335 |
| 1.387            | 1.147 | 1.113 | 4.942            | 6.019  | 3.289 | 4.467   | 3.503 | 4.708 |
| 1.161            | 1.138 | 1.236 | 4.698            | 6.928  | 2.655 | 3.010   | 7.073 | 4.111 |
| 1.156            | 1.304 | 1.133 | 5.313            | 7.594  | 4.721 | 3.364   | 6.985 | 6.506 |

**1 week**

| Negative control |       |       | Positive control |       |       | Samples |       |       |
|------------------|-------|-------|------------------|-------|-------|---------|-------|-------|
| A                | B     | C     | A                | B     | C     | A       | B     | C     |
| 1.878            | 2.263 | 1.014 | 6.406            | 4.390 | 3.893 | 11.941  | 4.529 | 3.207 |
| 1.011            | 0.405 | 1.013 | 7.185            | 3.868 | 3.166 | 14.905  | 3.855 | 3.599 |
| 1.948            | 1.022 | 1.063 | 5.209            | 3.168 | 2.809 | 6.087   | 2.889 | 3.703 |
| 1.979            | 1.010 | 1.029 | 3.729            | 3.897 | 6.112 | 4.083   | 2.220 | 3.834 |
| 1.032            | 2.260 | 2.329 | 2.932            | 3.494 | 8.444 | 3.805   | 3.948 | 4.353 |
| 1.327            | 1.006 | 1.019 | 4.510            | 3.844 | 8.332 | 2.378   | 3.408 | 3.798 |
| 1.007            | 1.382 | 1.040 | 4.532            | 3.493 | 6.384 | 3.528   | 3.289 | 3.260 |
| 1.019            | 1.009 | 1.061 | 5.431            | 5.315 | 7.135 | 3.995   | 4.123 | 3.251 |
| 1.020            | 1.015 | 2.476 | 6.853            | 7.392 | 2.758 | 4.249   | 5.130 | 5.932 |
| 2.138            | 0.405 | 2.091 | 9.068            | 6.386 | 4.788 | 5.794   | 5.410 |       |

**SCS8\_E1****48 hours**

| Negative control |       |       | Positive control |       |        | Samples |       |       |
|------------------|-------|-------|------------------|-------|--------|---------|-------|-------|
| A                | B     | C     | A                | B     | C      | A       | B     | C     |
| 1.034            | 1.039 | 1.037 | 3.654            | 3.405 | 9.763  | 3.401   | 2.465 | 2.270 |
| 1.040            | 1.038 | 1.035 | 2.928            | 3.635 | 5.104  | 2.120   | 1.276 | 1.949 |
| 1.049            | 1.040 | 1.036 | 3.534            | 3.399 | 5.972  | 2.152   | 2.560 | 2.939 |
| 1.027            | 1.043 | 1.041 | 3.391            | 3.181 | 3.551  | 1.139   | 3.362 | 3.423 |
| 1.036            | 1.040 | 1.036 | 4.292            | 3.141 | 4.171  | 2.405   | 3.249 | 1.955 |
| 1.040            | 1.045 | 1.040 | 5.108            | 3.005 | 5.583  | 4.449   | 3.075 | 2.398 |
| 1.037            | 1.047 | 1.044 | 4.314            | 3.098 | 9.342  | 3.331   | 2.239 | 2.131 |
| 1.036            | 1.044 | 1.044 | 2.952            | 3.590 | 6.087  | 2.020   | 6.705 | 2.051 |
| 1.042            | 1.046 | 1.034 | 4.145            | 2.746 | 14.189 | 1.261   | 4.081 | 1.012 |
| 1.040            | 1.036 | 1.037 | 4.802            | 2.963 | 19.094 | 2.597   |       |       |

**72 hours**

| Negative control |       |       | Positive control |        |        | Samples |       |        |
|------------------|-------|-------|------------------|--------|--------|---------|-------|--------|
| A                | B     | C     | A                | B      | C      | A       | B     | C      |
| 1.154            | 1.814 | 1.936 | 14.415           | 9.780  | 5.469  | 3.719   | 4.408 | 13.372 |
| 2.161            | 1.967 | 2.364 | 9.814            | 7.341  | 9.555  | 3.859   | 6.259 | 5.616  |
| 1.148            | 1.017 | 1.000 | 7.085            | 11.425 | 6.010  | 3.061   | 2.874 | 3.923  |
| 1.214            | 1.886 | 2.031 | 5.799            | 5.447  | 4.223  | 3.541   | 5.697 | 6.555  |
| 2.540            | 2.089 | 1.891 | 5.485            | 6.494  | 6.556  | 4.740   | 2.620 | 3.732  |
| 2.577            | 2.412 | 1.911 | 9.153            | 5.766  | 6.253  | 3.850   | 4.601 | 6.166  |
| 2.469            | 1.906 | 1.978 | 6.292            | 4.897  | 9.931  | 2.979   | 3.318 | 5.576  |
| 2.420            | 1.990 | 1.874 | 4.879            | 9.407  | 6.494  | 2.224   | 2.999 | 3.177  |
| 1.148            | 1.794 | 2.545 | 7.506            | 5.525  | 7.133  | 2.329   | 6.710 | 4.027  |
| 2.422            | 1.819 | 1.127 | 9.348            | 7.589  | 12.109 | 4.378   | 3.508 | 4.617  |

**1 week**

| Negative control |       |       | Positive control |        |        | Samples |        |        |
|------------------|-------|-------|------------------|--------|--------|---------|--------|--------|
| A                | B     | C     | A                | B      | C      | A       | B      | C      |
| 1.104            | 1.086 | 1.081 | 10.854           | 11.678 | 11.627 | 6.145   | 5.467  | 3.848  |
| 1.099            | 1.084 | 1.084 | 19.775           | 16.862 | 7.269  | 8.667   | 10.816 | 5.886  |
| 1.092            | 1.083 | 1.081 | 10.282           | 28.227 | 12.841 | 9.523   | 7.843  | 7.618  |
| 1.110            | 1.096 | 1.097 | 21.195           | 13.699 | 8.738  | 7.589   | 9.667  | 3.933  |
| 1.098            | 1.082 | 1.093 | 18.528           | 25.457 | 5.817  | 5.104   | 10.733 | 7.216  |
| 1.084            | 1.085 | 1.098 | 19.581           | 24.553 | 5.603  | 7.764   | 9.473  | 6.510  |
| 1.096            | 1.092 | 1.085 | 18.122           | 17.550 | 7.595  | 7.916   | 5.720  | 6.217  |
| 1.088            | 1.086 | 1.084 | 18.122           | 13.938 | 4.407  | 10.950  | 2.835  | 2.920  |
| 1.105            | 1.094 | 1.081 | 13.819           | 17.693 | 5.316  | 4.370   | 5.123  | 10.020 |
| 1.105            | 1.078 | 1.091 | 11.913           | 17.762 | 9.919  | 3.837   | 5.396  | 7.978  |

**48 hours**

| Negative control |       |       | Positive control |       |        | Samples |       |       |
|------------------|-------|-------|------------------|-------|--------|---------|-------|-------|
| A                | B     | C     | A                | B     | C      | A       | B     | C     |
| 1.114            | 1.109 | 1.139 | 3.436            | 3.677 | 6.276  | 3.017   | 2.676 | 2.319 |
| 1.157            | 1.125 | 1.131 | 2.766            | 4.319 | 7.093  | 3.354   | 2.792 | 3.752 |
| 1.127            | 1.128 | 1.108 | 2.992            | 4.336 | 10.866 | 4.049   | 3.047 | 3.655 |
| 1.170            | 1.108 | 1.142 | 2.789            | 7.684 | 11.910 | 3.084   | 5.692 | 2.309 |
| 1.119            | 1.142 | 1.126 | 3.253            | 9.131 | 4.874  | 3.858   | 4.989 | 2.957 |
| 1.160            | 1.125 | 1.121 | 4.249            | 6.830 | 3.657  | 3.315   | 4.386 | 4.152 |
| 1.126            | 1.144 | 1.132 | 6.195            | 6.954 | 5.149  | 2.216   | 2.921 | 2.660 |
| 1.130            | 1.144 | 1.123 | 6.650            | 5.865 | 5.368  | 2.410   | 4.083 | 3.609 |
| 1.121            | 1.137 | 1.143 | 5.373            | 3.648 | 4.131  | 2.485   | 2.789 | 2.004 |
| 1.129            | 1.127 | 1.108 | 3.505            | 9.001 | 5.749  | 2.275   | 3.141 | 2.873 |

| Negative control |       |       | Positive control |       |       | Samples |       |       |
|------------------|-------|-------|------------------|-------|-------|---------|-------|-------|
| A                | B     | C     | A                | B     | C     | A       | B     | C     |
| 1.194            | 1.473 | 1.177 | 5.186            | 4.579 | 3.742 | 1.628   | 3.175 | 2.115 |
| 1.212            | 1.204 | 1.175 | 7.866            | 4.020 | 3.800 | 1.702   | 2.487 | 1.669 |
| 1.195            | 1.203 | 1.172 | 6.800            | 3.882 | 3.240 | 1.560   | 4.158 | 3.527 |
| 1.166            | 0.515 | 1.176 | 6.114            | 4.885 | 3.512 | 2.878   | 3.402 | 2.064 |
| 1.166            | 1.195 | 1.422 | 2.959            | 3.865 | 3.476 | 3.157   | 2.315 | 2.097 |
| 1.186            | 1.208 | 1.367 | 6.438            | 3.368 |       | 3.986   | 4.505 | 2.920 |
| 1.186            | 1.202 | 1.167 | 7.117            | 5.327 |       | 2.306   | 1.565 | 2.410 |
| 1.195            | 1.202 | 1.178 | 4.538            | 5.183 |       | 1.964   | 2.240 | 2.149 |
| 0.112            | 1.218 | 1.052 | 6.001            | 3.718 |       | 1.760   | 3.914 | 1.968 |
| 0.136            | 1.210 | 1.169 | 4.909            |       |       | 2.182   | 1.594 | 2.191 |

| Negative control |       |       | Positive control |        |       | Samples |       |        |
|------------------|-------|-------|------------------|--------|-------|---------|-------|--------|
| A                | B     | C     | A                | B      | C     | A       | B     | C      |
| 0.977            | 0.980 | 0.987 | 10.169           | 7.289  | 6.249 | 5       | 5.875 | 7.624  |
| 0.979            | 0.982 | 0.992 | 10.939           | 6.272  | 6.927 | 3.629   | 8.036 | 10.562 |
| 0.976            | 0.981 | 0.985 | 10.906           | 8.708  | 8.091 | 5.090   | 8.125 | 6.770  |
| 0.978            | 0.981 | 0.984 | 8.458            | 7.753  | 9.636 | 2.769   | 4.222 | 4.524  |
| 0.979            | 0.977 | 0.987 | 8.487            | 9.275  | 7.682 | 3.040   | 8.037 | 10.005 |
| 0.977            | 0.980 | 0.983 | 7.379            | 11.038 | 9.424 | 2.870   | 7.496 | 7.321  |
| 0.977            | 0.983 | 0.986 | 7.037            | 9.464  | 8.496 | 2.444   | 8.740 | 6.960  |
| 0.979            | 0.982 | 0.986 | 9.479            | 10.287 | 8.442 | 7.408   | 8.384 | 9.671  |
| 0.995            | 0.981 | 0.987 | 7.936            | 8.904  | 9.263 | 6.915   | 6.304 | 4.397  |
| 0.980            |       | 0.991 | 8.981            | 10.695 | 7.565 | 6.052   | 7.808 | 6.863  |
|                  |       |       |                  |        |       | 3.789   |       |        |

**SM10. Figure S6 : Shape variables**

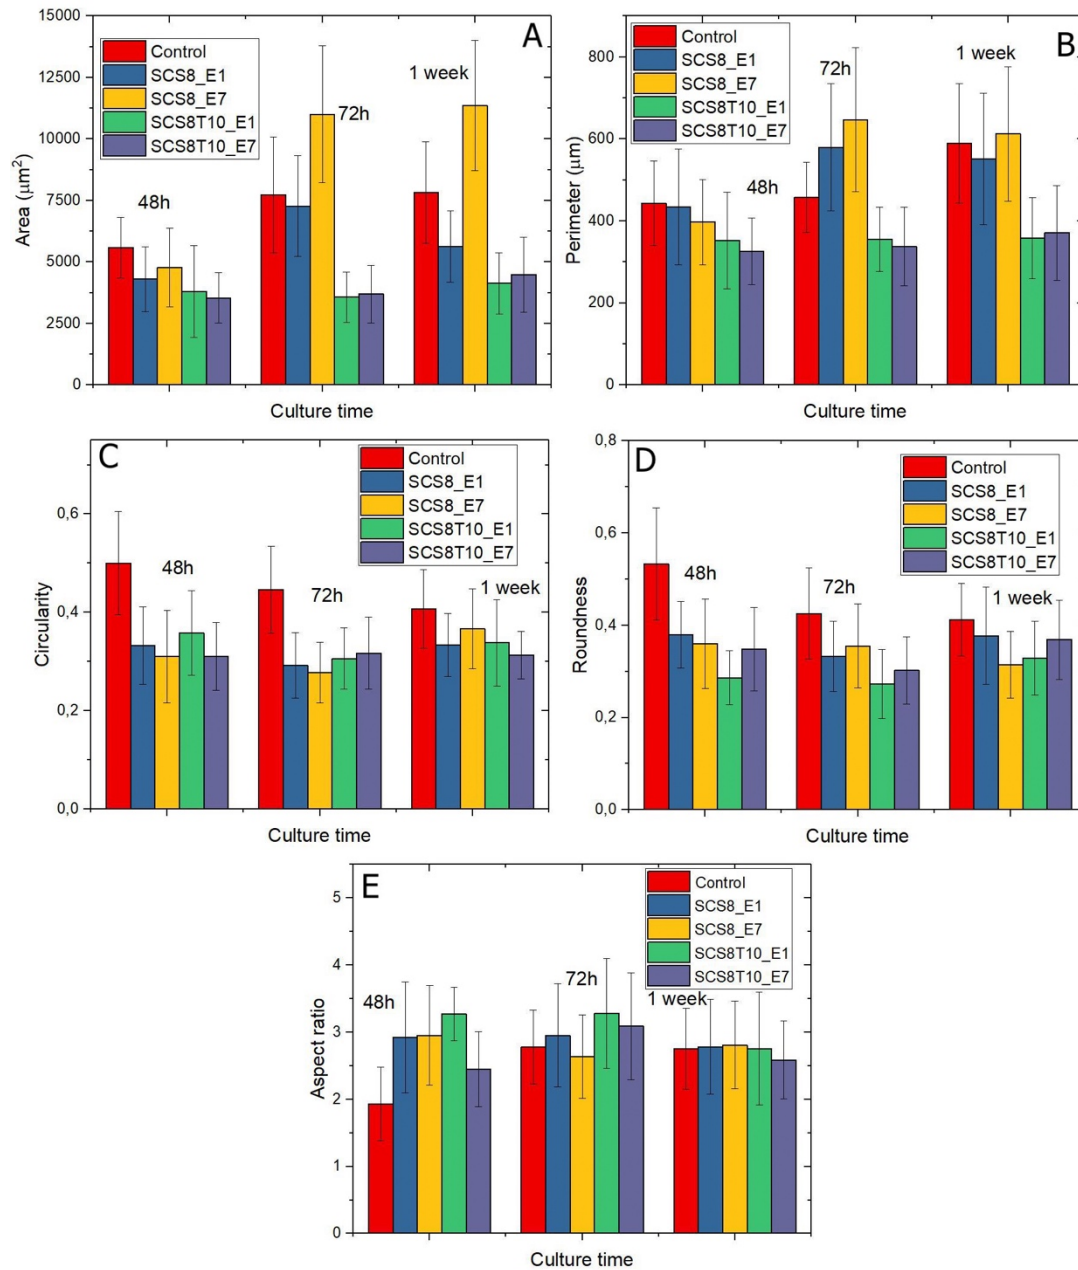

**Figure S6.** Shape variables. (A) Quantification of cellular spread area, (B) Quantification of cellular perimeter, (C) Quantification of cellular circularity, (D) Quantification of cellular roundness, (E) Quantification of cellular aspect ratio .



# SM 11: Table S5. Significant differences between shape variables intergroups

**Table S5.** Shape variables analysis . CI 95%. Statystical significance  $p < 0.005$ .

| Variable     | Significance                    |
|--------------|---------------------------------|
| Area         | $F(14, 144) = 36.299; p < 0.05$ |
| Aspect ratio | $F(14, 260) = 5.943; p < 0.05$  |
| Circularity  | $F(14, 290) = 15.798; p < 0.05$ |
| Perimeter    | $F(14, 240) = 19.097; p < 0.05$ |
| Roundness    | $F(14, 254) = 13.339; p < 0.05$ |

## SM 12:

**Table S6.** Pairwise differences between groups with 95% confidence interval.

| Variable     | Culture time | Sample 1   | Sample 2   | Significance ( $p < 0.05$ ) |
|--------------|--------------|------------|------------|-----------------------------|
| Area         | 48h          | Control    | SCS8T10_E7 | $t(144) = 5.31$             |
|              |              | Control    | SCS8T10_E1 | $t(144) = 6.43$             |
|              |              |            | SCS8T10_E7 | $t(144) = 5.99$             |
|              |              | SCS8_E1    | SCS8_E7    | $t(144) = 4.58$             |
|              | 7 days       |            | SCS8T10_E1 | $t(144) = 6.93$             |
|              |              |            | SCS8T10_E7 | $t(144) = 6.31$             |
|              |              | Control    | SCS8_E7    | $t(144) = 3.89$             |
|              |              |            | SCS8T10_E1 | $t(144) = 5.71$             |
|              |              |            | SCS8T10_E7 | $t(144) = 4.32$             |
|              |              | SCS8_E1    | SCS8_E7    | $t(144) = 7.52$             |
|              |              | SCS8_E7    | SCS8T10_E1 | $t(144) = 10.54$            |
|              |              |            | SCS8T10_E7 | $t(144) = 8.52$             |
|              |              |            |            |                             |
|              |              |            |            |                             |
|              |              |            |            |                             |
| Aspect ratio | 48h          | Control    | SCS8_E1    | $t(260) = -5.38$            |
|              |              |            | SCS8_E7    | $t(260) = -6.059$           |
|              |              |            | SCS8T10_E1 | $t(260) = -9.006$           |
|              |              | SCS8T10_E1 | SCS8T10_E7 | $t(260) = 4.670$            |
| Circularity  | 48h          | Control    | SCS8_E1    | $t(290) = 6.207$            |
|              |              |            | SCS8_E7    | $t(290) = 6.785$            |
|              |              |            | SCS8T10_E1 | $t(290) = 4.733$            |
|              |              |            | SCS8T10_E7 | $t(290) = 6.666$            |
|              | 72h          | Control    | SCS8_E1    | $t(290) = 7.777$            |
|              |              |            | SCS8_E7    | $t(290) = 8.047$            |
|              |              |            | SCS8T10_E1 | $t(290) = 7.000$            |
|              |              |            | SCS8T10_E7 | $t(290) = 5.375$            |
|              | 7 days       | Control    | SCS8_E1    | $t(290) = 4.055$            |
|              |              |            | SCS8T10_E1 | $t(290) = 3.631$            |
|              |              |            | SCS8T10_E7 | $t(290) = 4.459$            |

|           |        |         |            |                 |
|-----------|--------|---------|------------|-----------------|
| Perimeter | 48h    | Control | SCS8T10_E7 | t(240) = 4.680  |
|           | 72h    | Control | SCS8_E7    | t(240) = -4.725 |
|           |        |         | SCS8T10_E1 | t(240) = 3.643  |
|           |        |         | SCS8T10_E7 | t(240) = 4.285  |
|           |        | SCS8_E1 | SCS8T10_E1 | t(240) = 6.588  |
|           |        |         | SCS8T10_E7 | t(240) = 6.540  |
|           |        | SCS8_E7 | SCS8T10_E1 | t(240) = 7.784  |
|           |        |         | SCS8T10_E7 | t(240) = 7.536  |
|           | 7 days | Control | SCS8T10_E1 | t(240) = 6.969  |
|           |        |         | SCS8T10_E7 | t(240) = 5.069  |
|           |        | SCS8_E1 | SCS8T10_E1 | t(240) = 5.848  |
|           |        |         | SCS8T10_E7 | t(240) = 4.090  |
|           |        | SCS8_E7 | SCS8T10_E1 | t(240) = 6.658  |
|           |        |         | SCS8T10_E7 | t(240) = 5.127  |
| Roundness | 48h    | Control | SCS8_E1    | t(254) = 5.464  |
|           |        |         | SCS8_E7    | t(254) = 5.766  |
|           |        |         | SCS8T10_E1 | t(254) = 8.482  |
|           |        |         | SCS8T10_E7 | t(254) = 5.575  |
|           |        | SCS8_E1 | SCS8T10_E1 | t(254) = 4.650  |
|           | 72h    | Control | SCS8T10_E1 | t(254) = 5.629  |
|           |        |         | SCS8T10_E7 | t(254) = 3.967  |
|           | 7 days | Control | SCS8_E7    | t(254) = 4,041  |

**SM13. Figure S7. Mineralization of SCS8T10 E1 and SCS8T10\_E7**

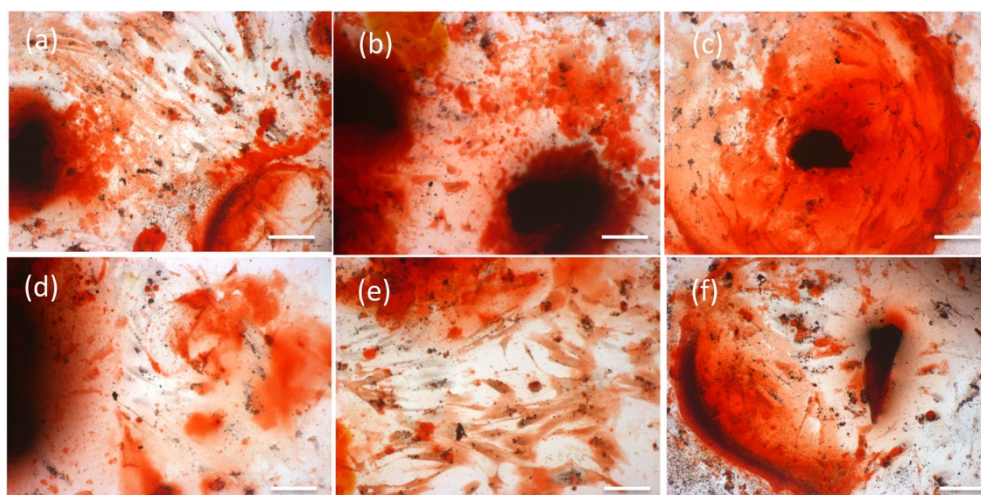

**Figure S7.** Alizarin red staining (red) reveals the significant effect of xerogels SCS8T10\_E1 and SCS8T10\_E7 on mineralization. In (A,B,C) : HOB® cells grown on SCS8T10\_E1; and in (D,E,F): cells grown on SCS8T10\_E7.
